# Supplementary material for: A selective hybrid fluorescent sensor for fructose detection based on a phenylboronic acid and BODIPY-based hydrophobicity probe
Source: Royal Society of Chemistry journal article supplement (doi:10.1039/d2ra01569b), 2022-01-01
Supplement: d2ra01569b1.pdf [file d2ra01569b1.pdf]

## Supporting Information

### A selective hybrid fluorescent sensor for fructose detection based on a pheyboronic acid and BODIPY-based hydrophobicity probe

Gengo Kashiwazaki,<sup>a</sup> Ryo Watanabe,<sup>a</sup> Akihiro Nishikawa,<sup>a</sup> Koyori Kawamura,<sup>b</sup> Takashi Kitayama,<sup>a\*</sup> Takao Hibi<sup>b\*</sup>

<sup>a</sup>Major in Advanced Bioscience, Graduate School of Agriculture, Kindai University, 3327-204, Nakamachi, Nara, Nara 631-8505, Japan

<sup>b</sup>4-1-1 Matsuoka-Kenjojima, Eiheiiji, Fukui 910-1195, Japan.

To whom correspondence should be addressed. E-mail: [kitayama@nara.kindai.ac.jp](mailto:kitayama@nara.kindai.ac.jp), and [hibi@fpu.ac.jp](mailto:hibi@fpu.ac.jp)

### Table of contents

|                                                                                       |           |
|---------------------------------------------------------------------------------------|-----------|
| A correlation plot of the fluorescence intensities of HPSensor2 vs. the $E_T^N$ value | Figure S1 |
| <sup>1</sup> H NMR spectrum of compound <b>2</b>                                      | Figure S2 |
| <sup>1</sup> H NMR spectrum of compound <b>3</b>                                      | Figure S3 |
| <sup>1</sup> H NMR spectrum of compound <b>4</b>                                      | Figure S4 |
| <sup>13</sup> C{ <sup>1</sup> H} NMR spectrum of compound <b>4</b>                    | Figure S5 |
| <sup>1</sup> H NMR spectrum of compound <b>5</b>                                      | Figure S6 |
| <sup>13</sup> C{ <sup>1</sup> H} NMR spectrum of compound <b>5</b>                    | Figure S7 |
| <sup>1</sup> H NMR spectrum of compound <b>6</b>                                      | Figure S8 |
| <sup>13</sup> C{ <sup>1</sup> H} NMR spectrum of compound <b>6</b>                    | Figure S9 |
| Effect of interference substances on fructose assay                                   | Table S1  |

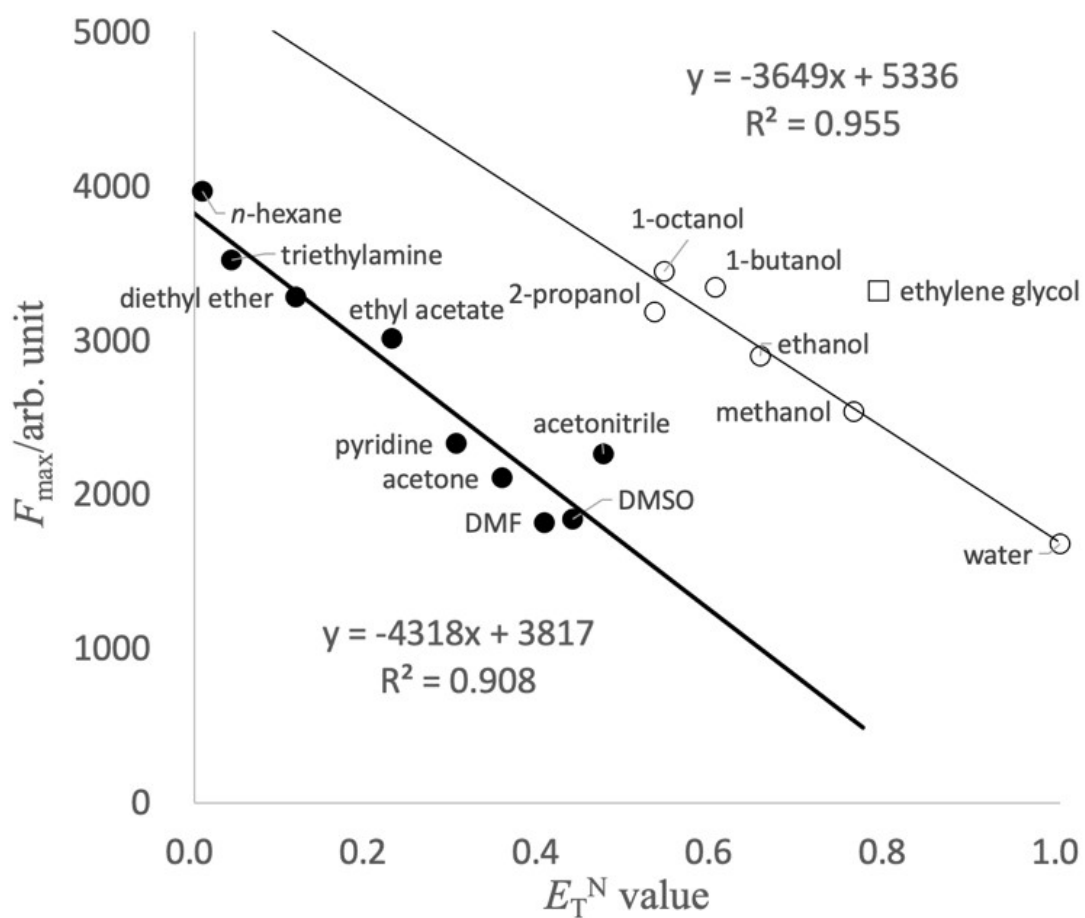

**Figure S1.** A correlation plot of the fluorescence intensities of HPSensor2 vs. the  $E_T^N$  value of the respective solvent.

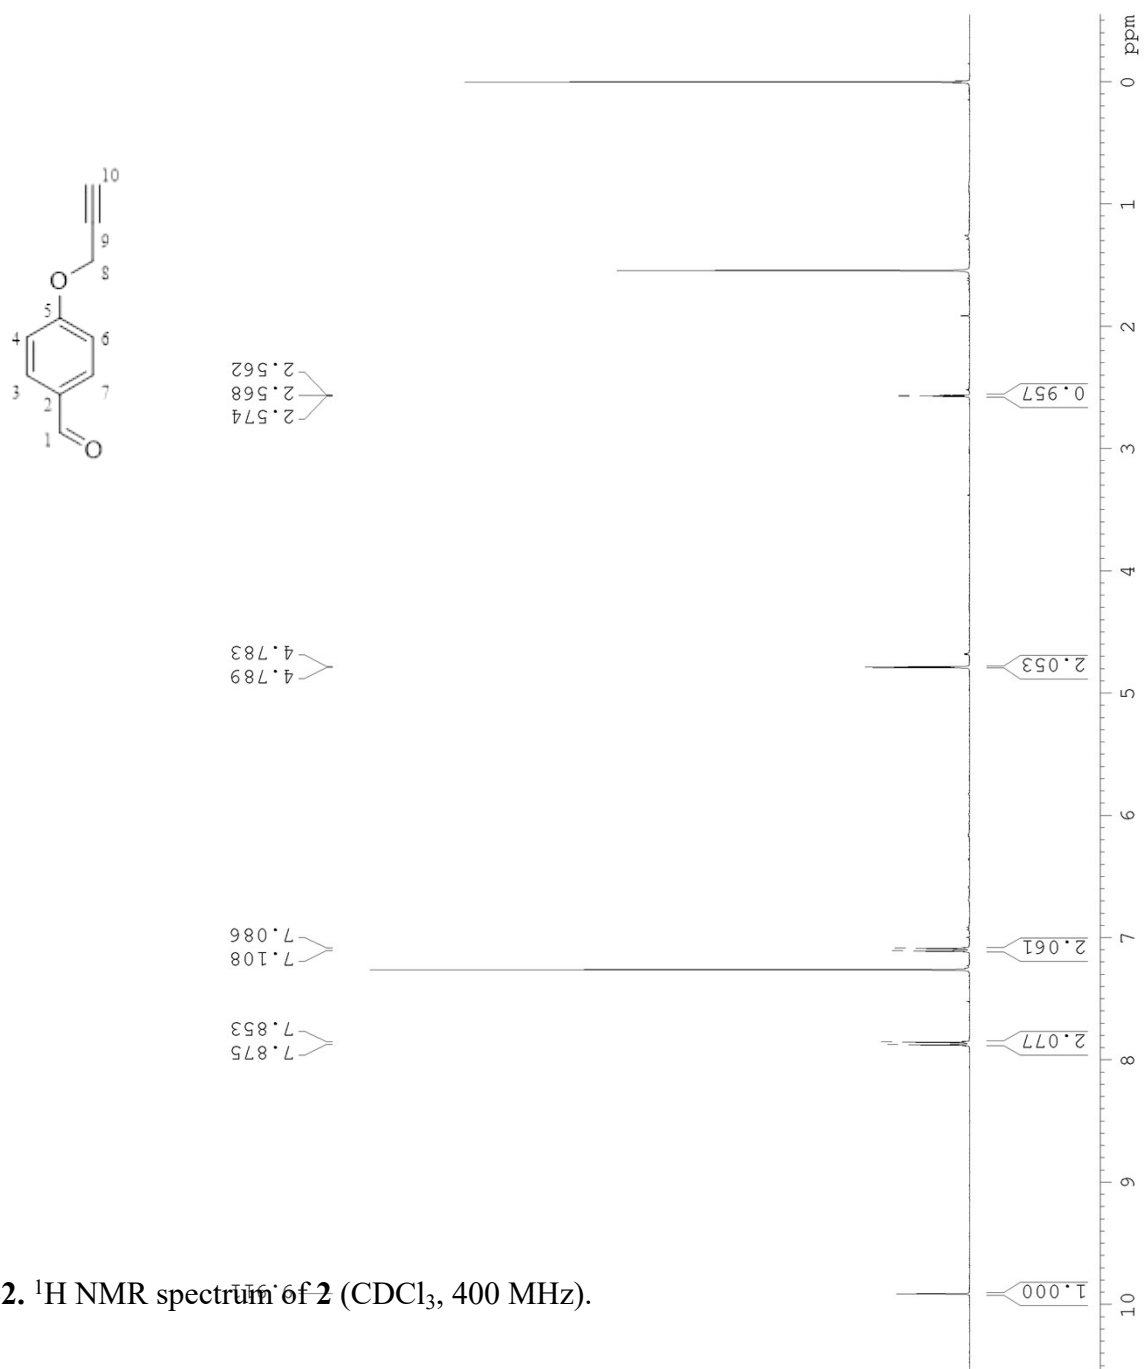

**Figure S2.**  $^1\text{H}$  NMR spectrum of **2** (CDCl<sub>3</sub>, 400 MHz).

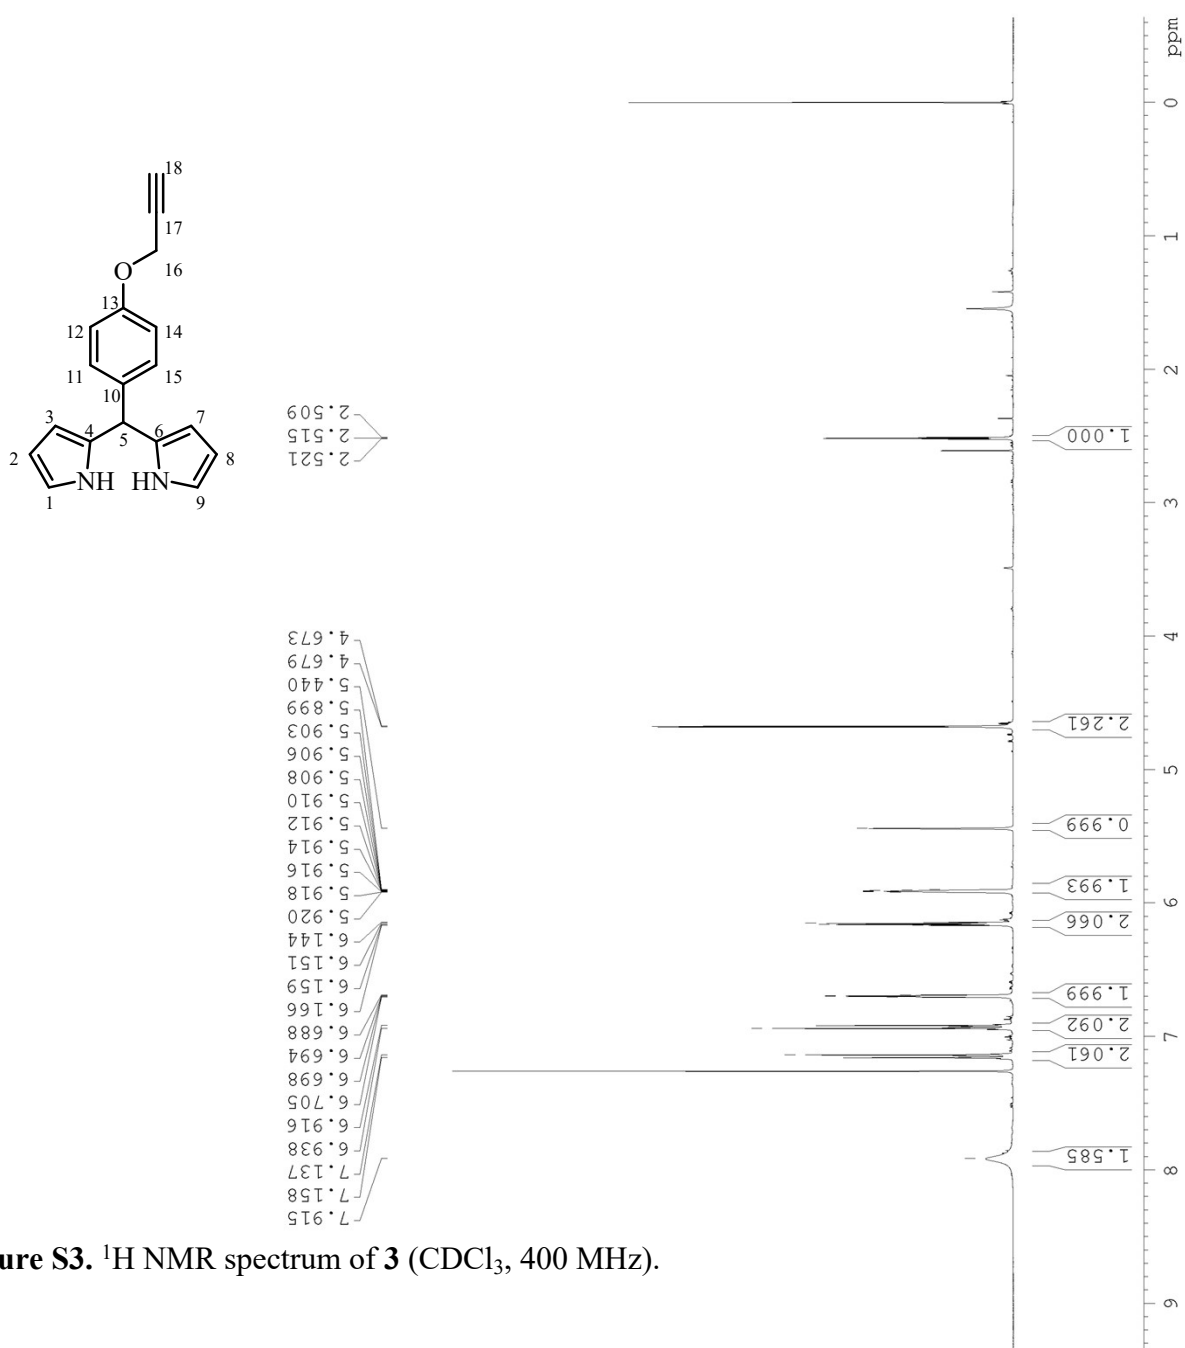

**Figure S3.**  $^1\text{H}$  NMR spectrum of **3** (CDCl<sub>3</sub>, 400 MHz).

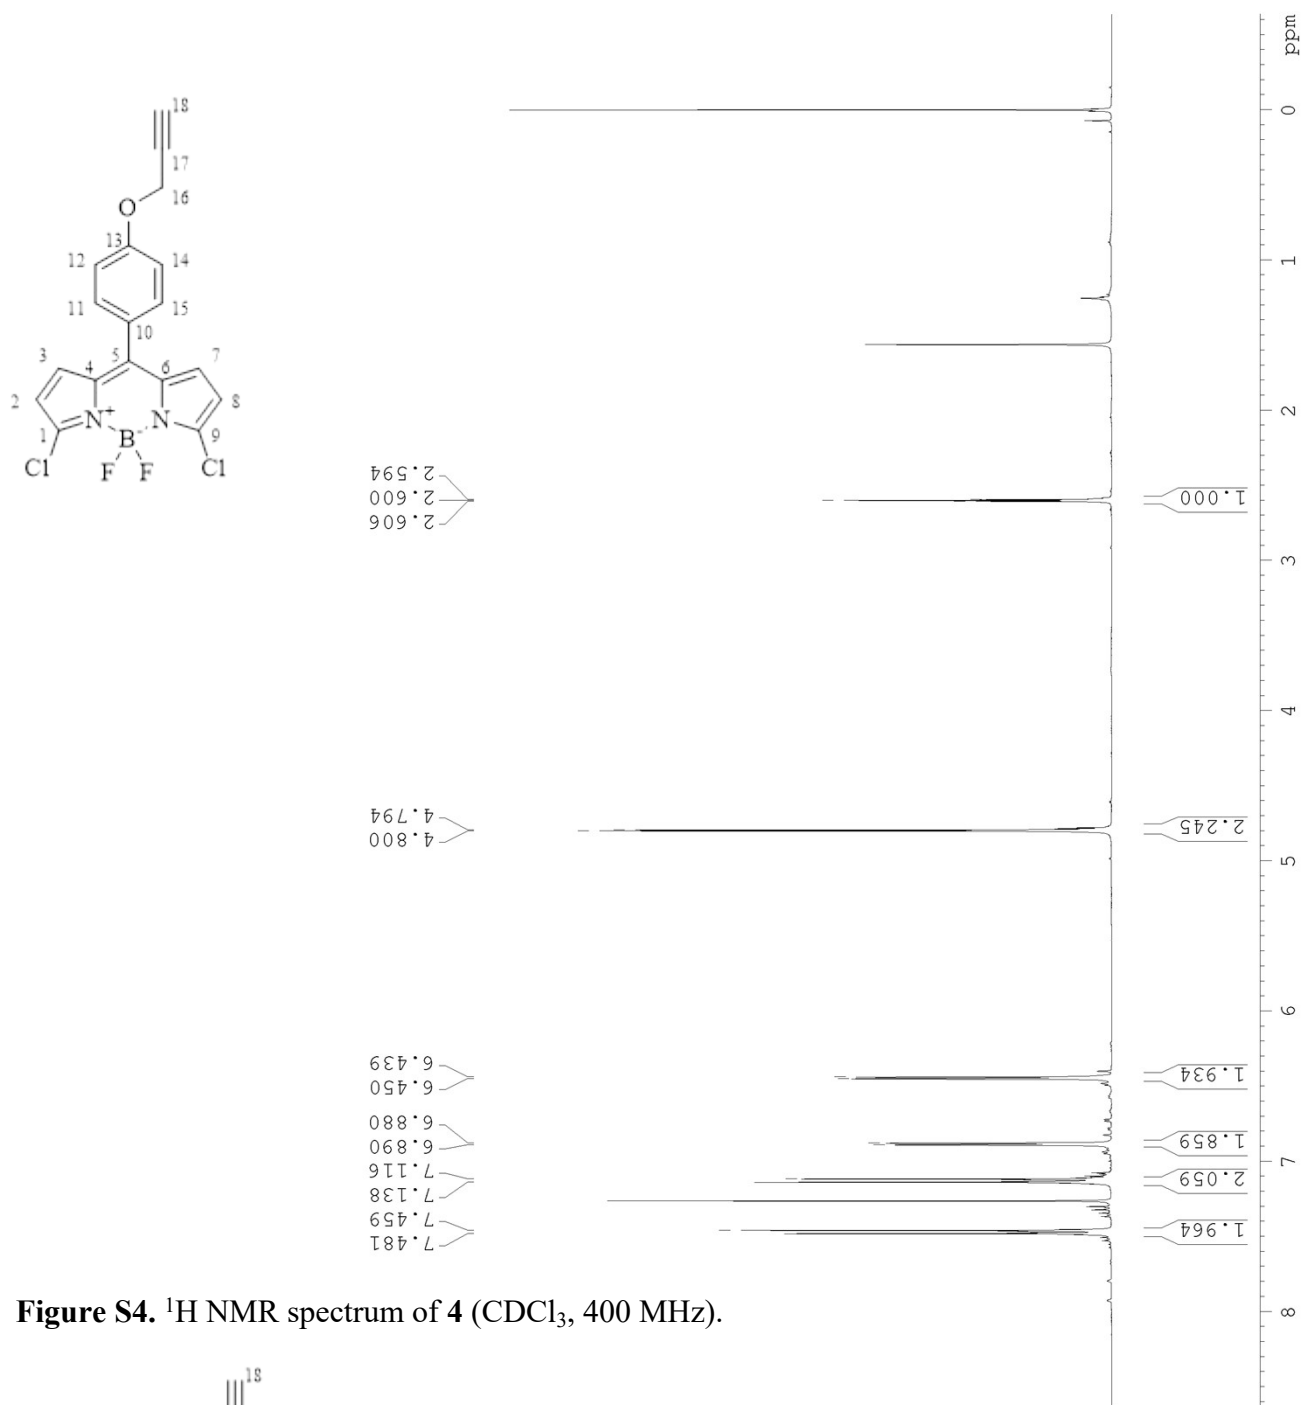

**Figure S4.** <sup>1</sup>H NMR spectrum of **4** (CDCl<sub>3</sub>, 400 MHz).

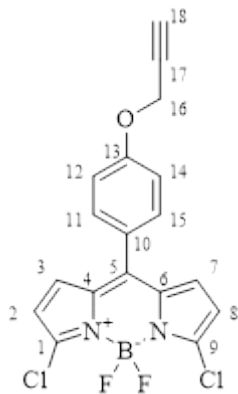

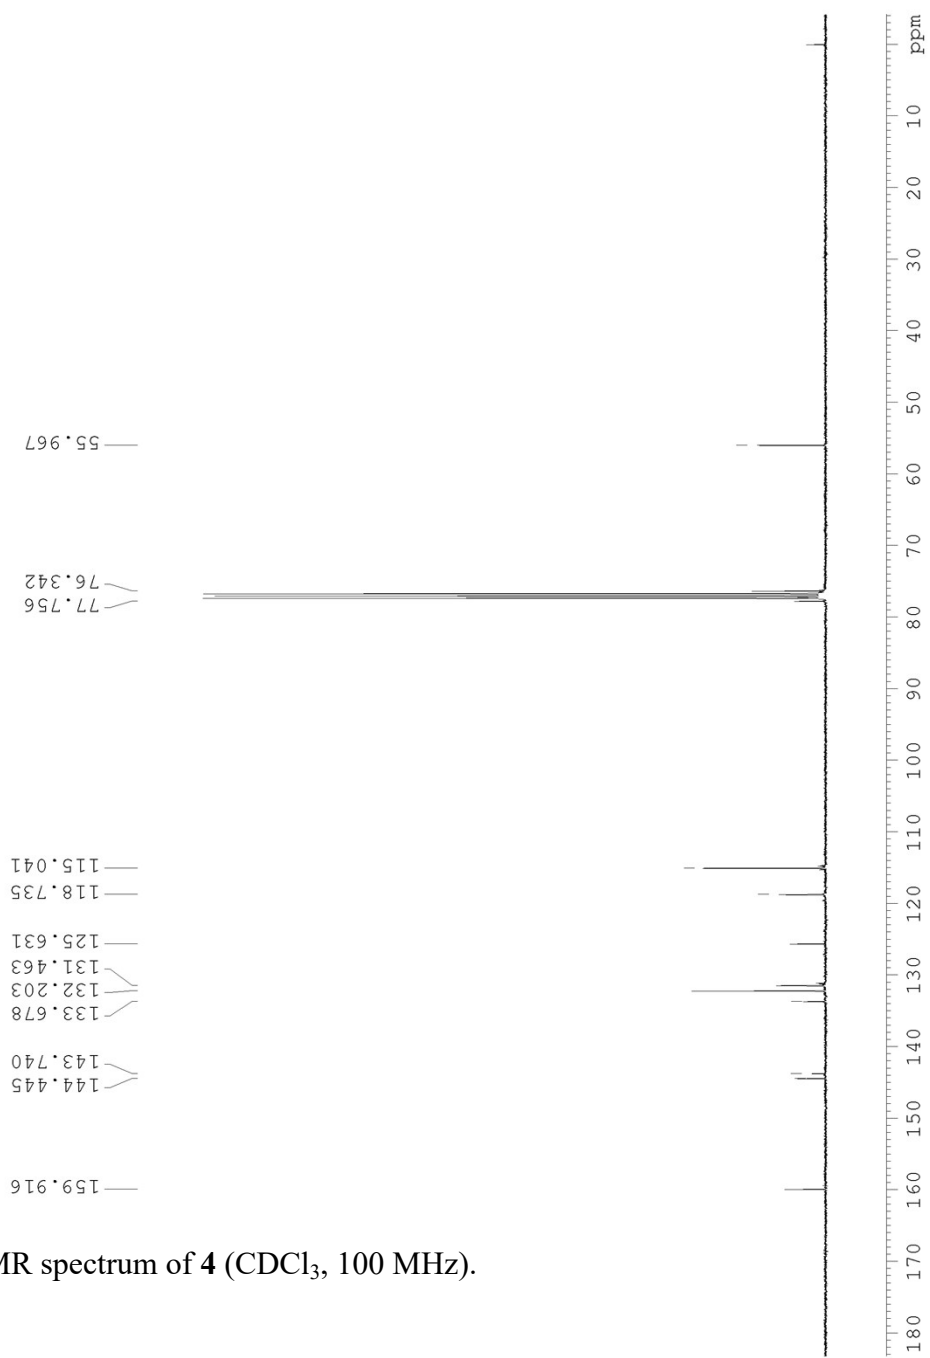

**Figure S5.**  $^{13}\text{C}\{^1\text{H}\}$  NMR spectrum of **4** (CDCl<sub>3</sub>, 100 MHz).

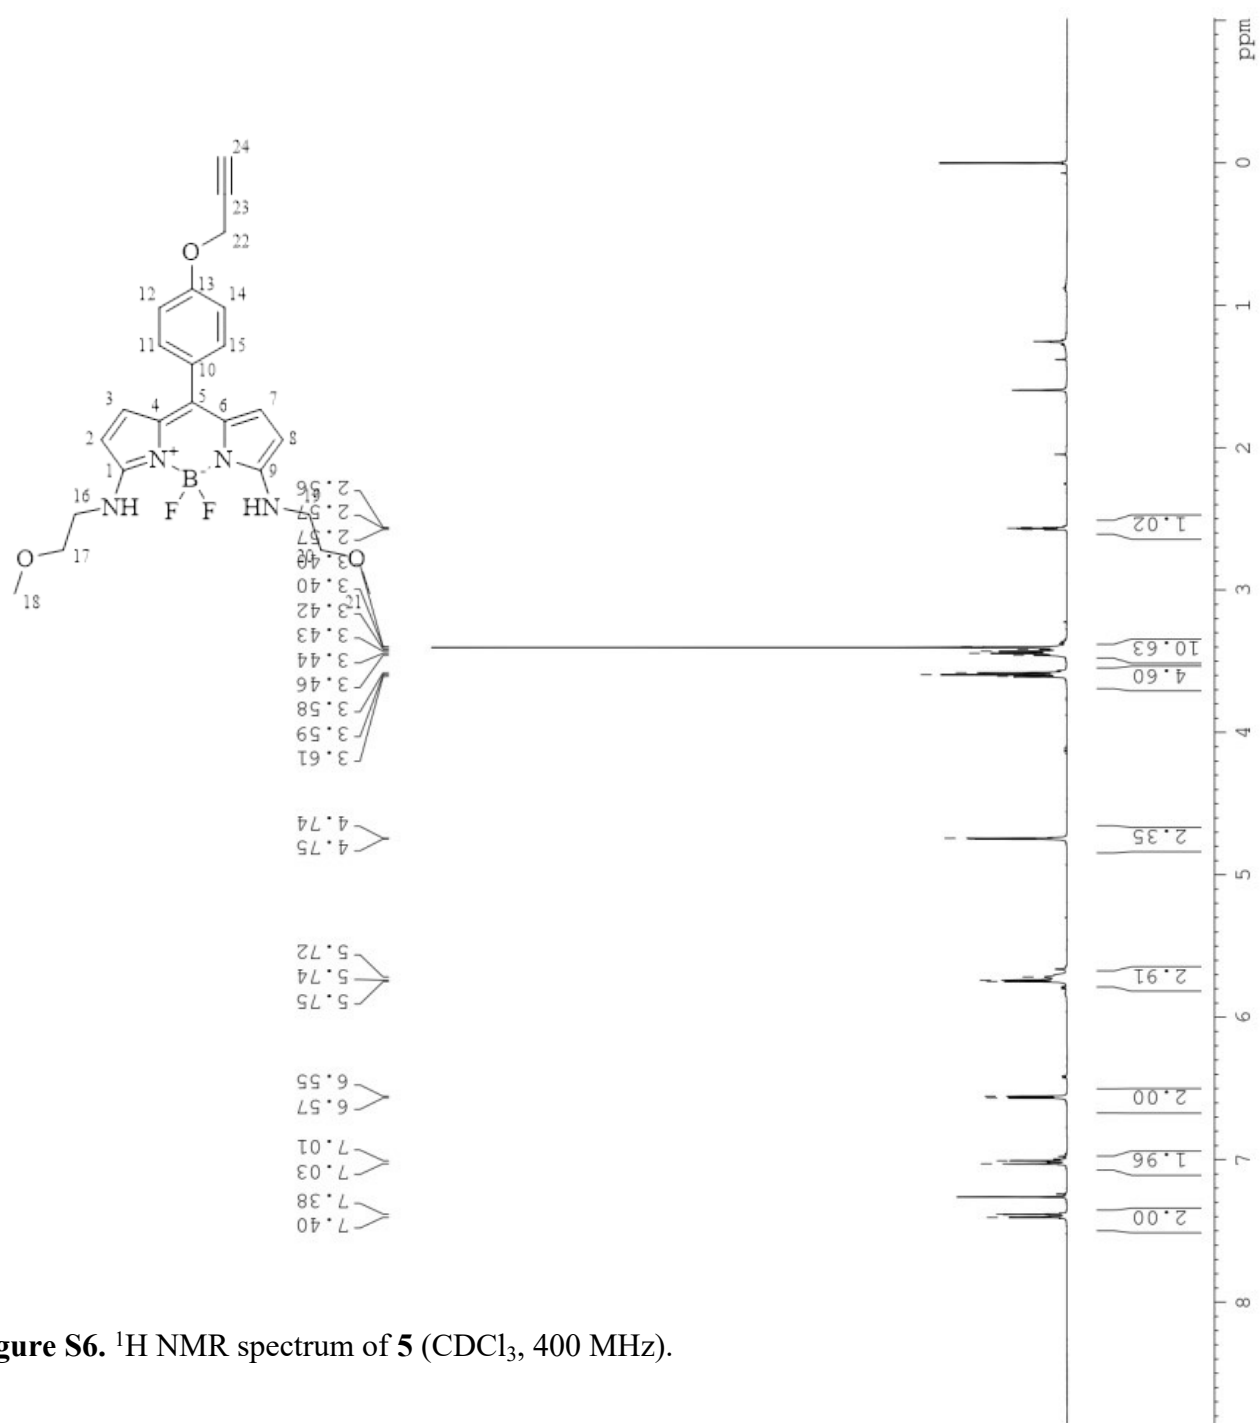

**Figure S6.**  $^1\text{H}$  NMR spectrum of **5** ( $\text{CDCl}_3$ , 400 MHz).

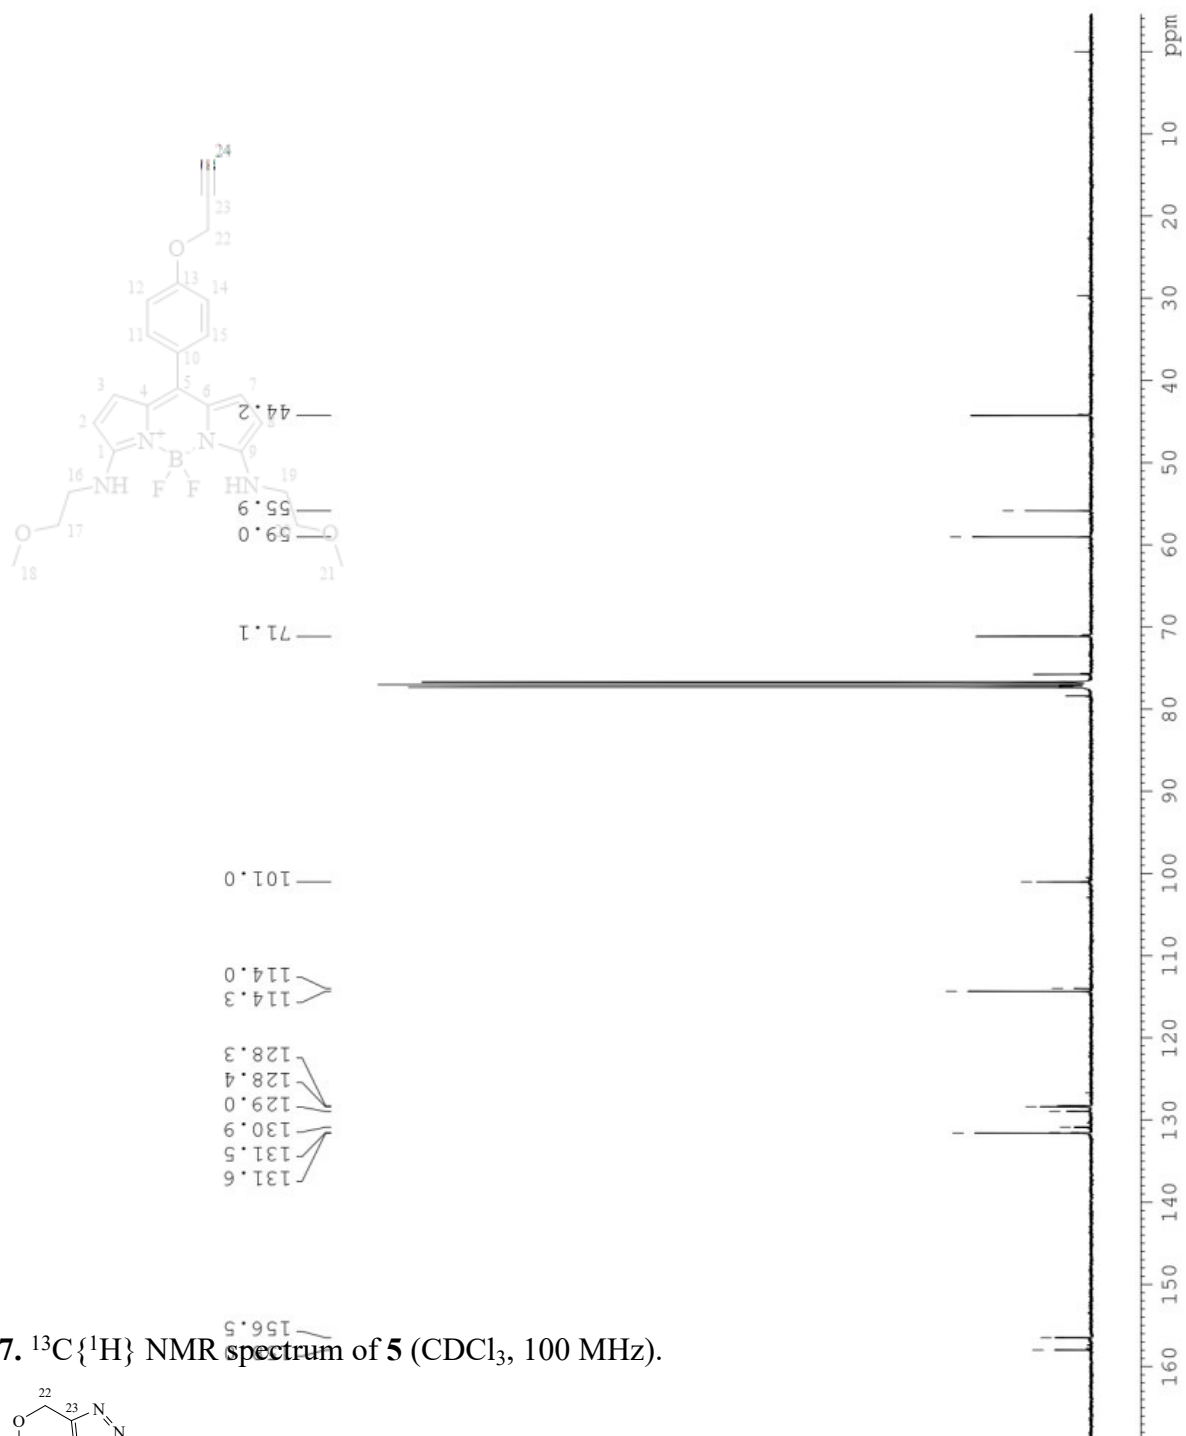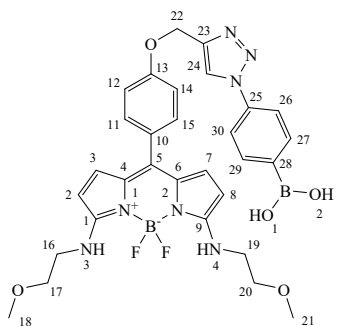



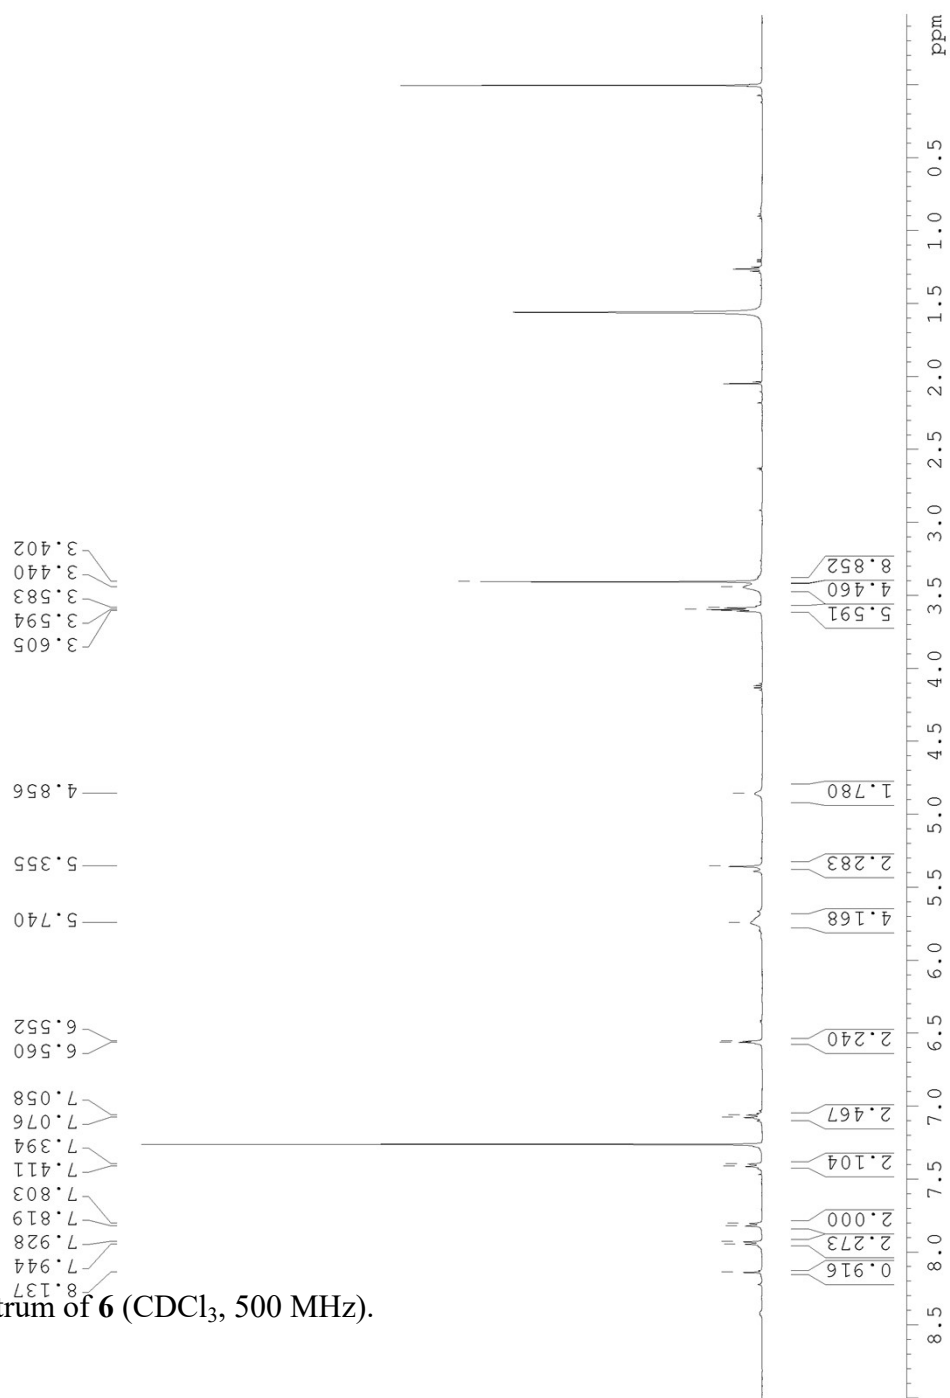

**Figure S8.**  $^1\text{H}$  NMR spectrum of **9** ( $\text{CDCl}_3$ , 500 MHz).

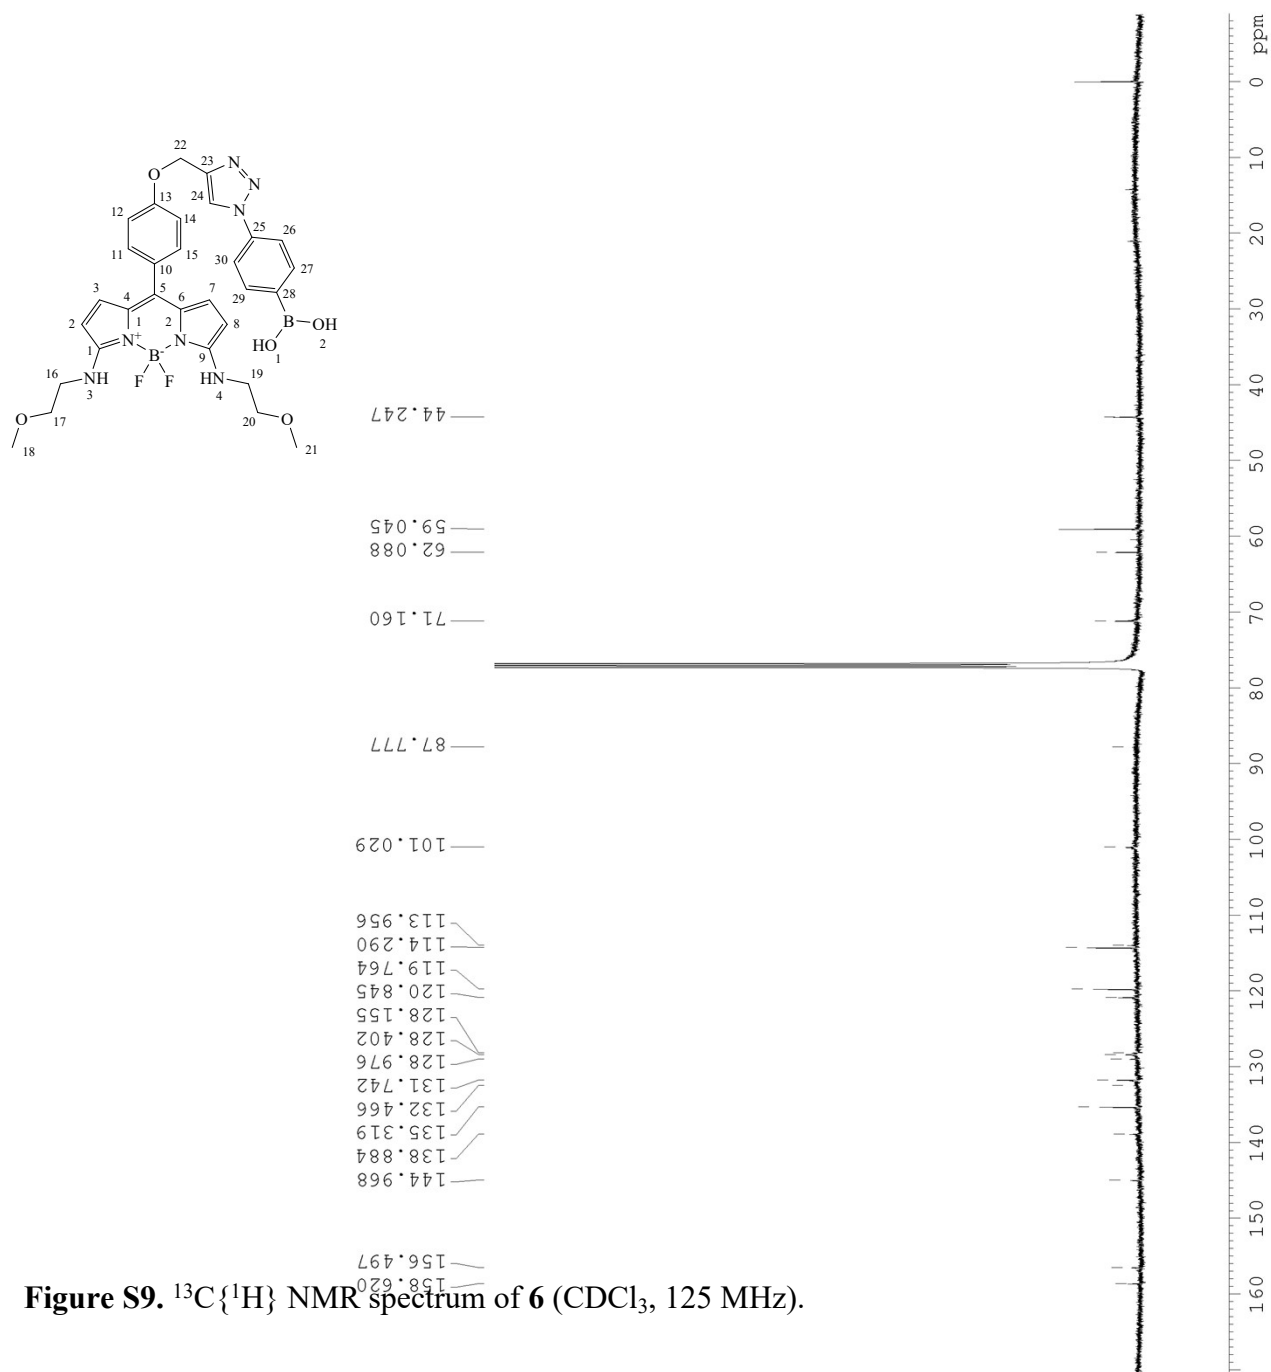

**Figure S9.**  $^{13}\text{C}\{^1\text{H}\}$  NMR spectrum of **6** (CDCl<sub>3</sub>, 125 MHz).

Table S1: Effect of interference substances on fructose assay

| sample                         | $\Delta F \pm SE (n = 3)$ |
|--------------------------------|---------------------------|
| 2 mM D-fructose                | 361 $\pm$ 29              |
| + 1 mM uric acid               | 389 $\pm$ 10              |
| + 1 mM ascorbic acid*          | 424 $\pm$ 15              |
| + 0.5%(v/v) ethanol            | 375 $\pm$ 7               |
| + 0.5 mg/mL hen egg lysozyme   | 383 $\pm$ 10              |
| + 0.5 mg/mL chicken ovalbumin* | 892 $\pm$ 13              |

\*ANOVA followed by Dunnett's test showed that the changes after the addition of interference substances are statistically significant ( $P < 0.05$ ).
